# Supplementary material
Source: ML conference proceedings conference paper supplement (https://openreview.net/forum?id=6x9BJmr2lB)

# Quantum Transformer Multi-Class ROC Curves

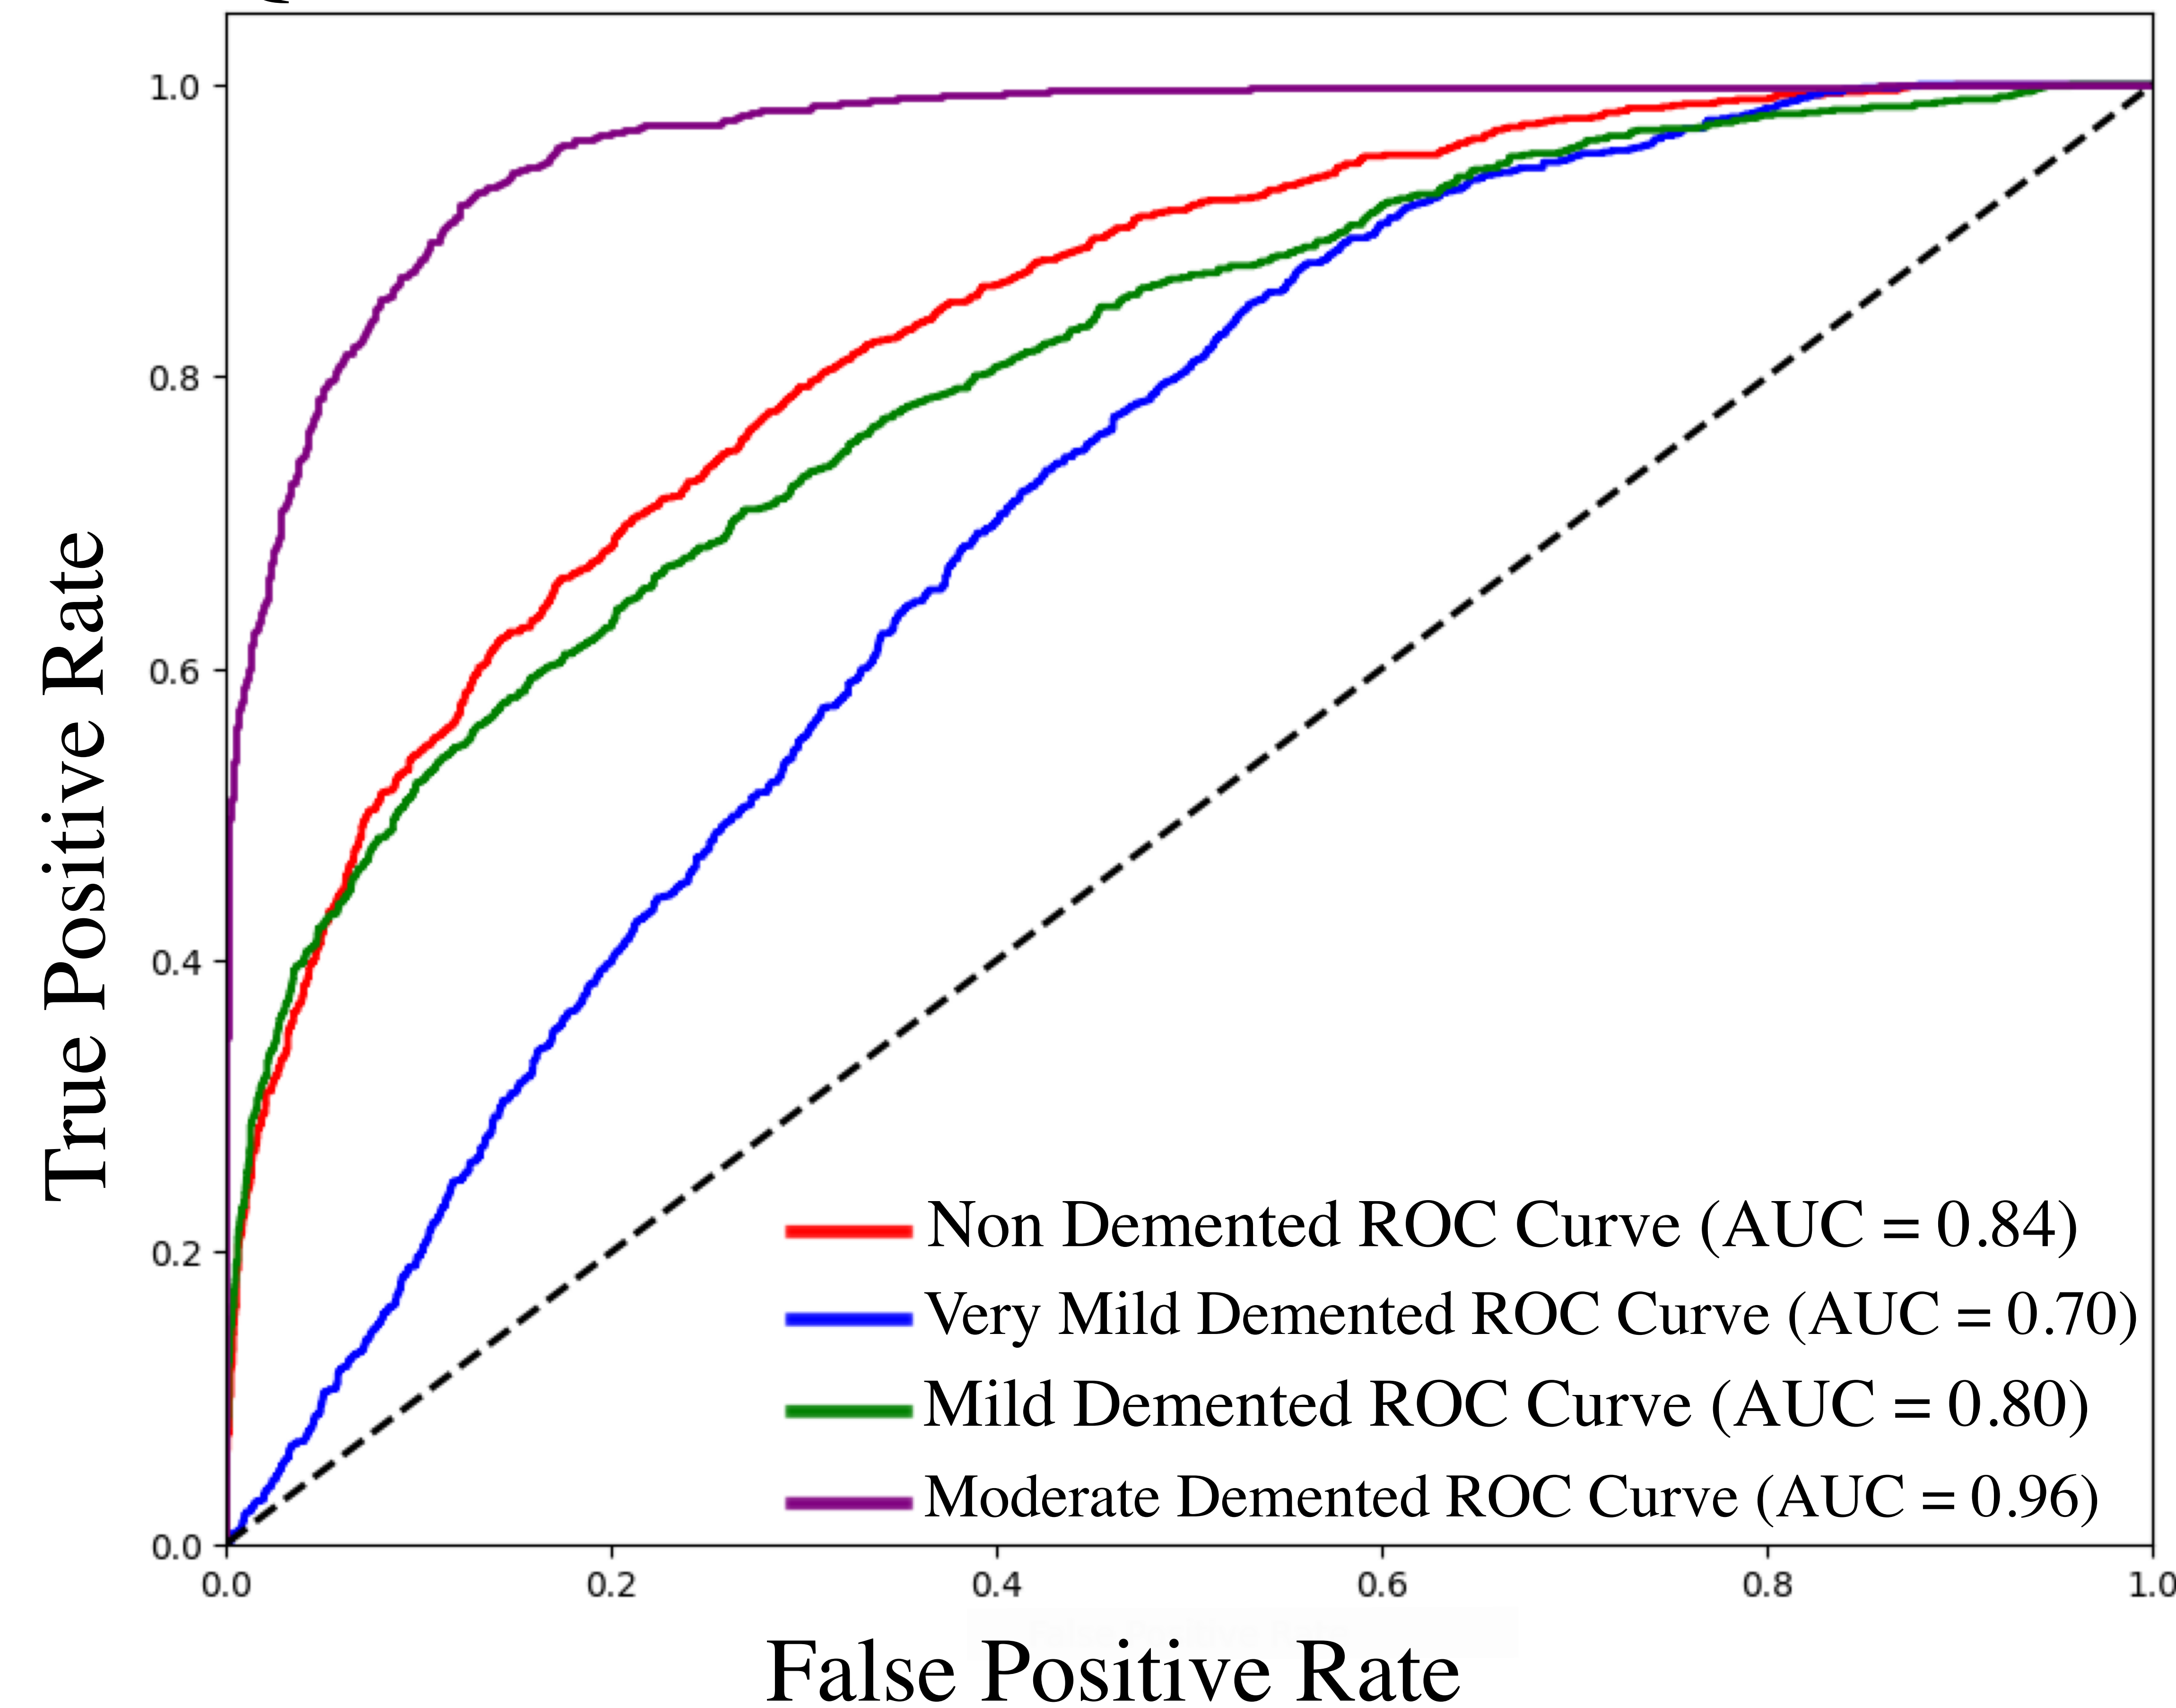

# Classical Transformer Multi-Class ROC Curves

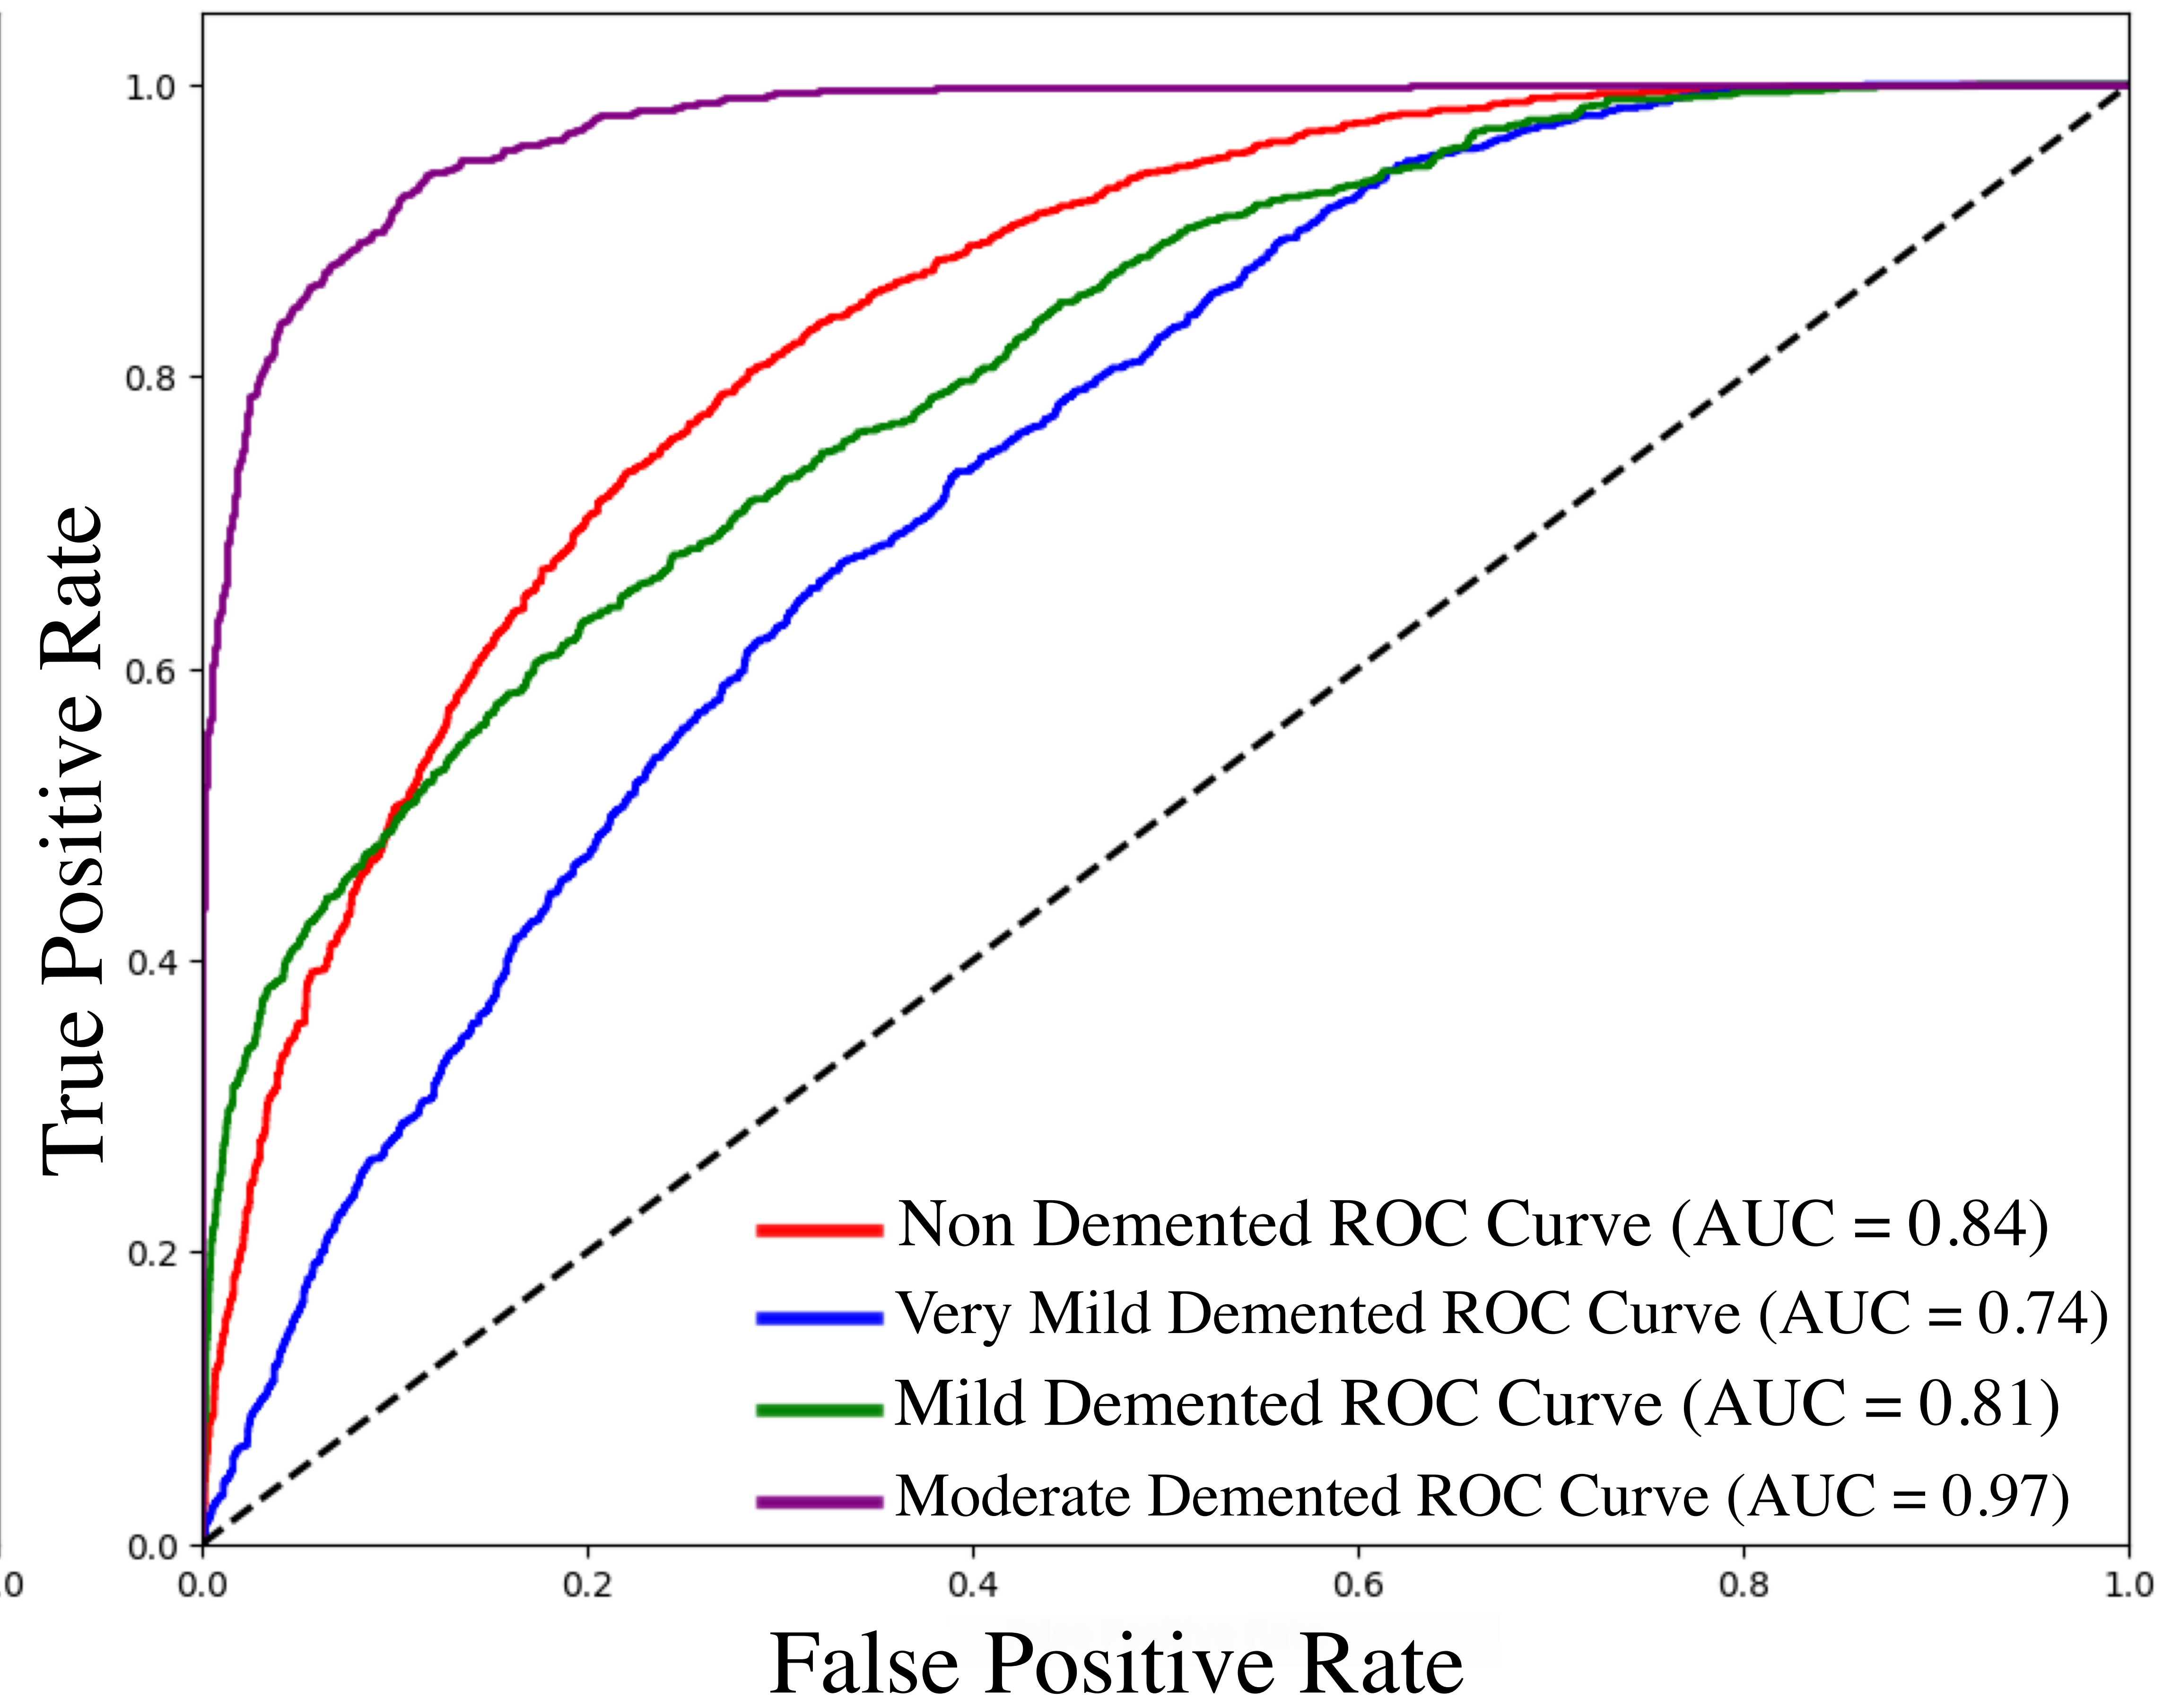

Supplement: supplementary_material [file attachment]

# Quantum Vision Transformer for Alzheimer's (QViSTA)

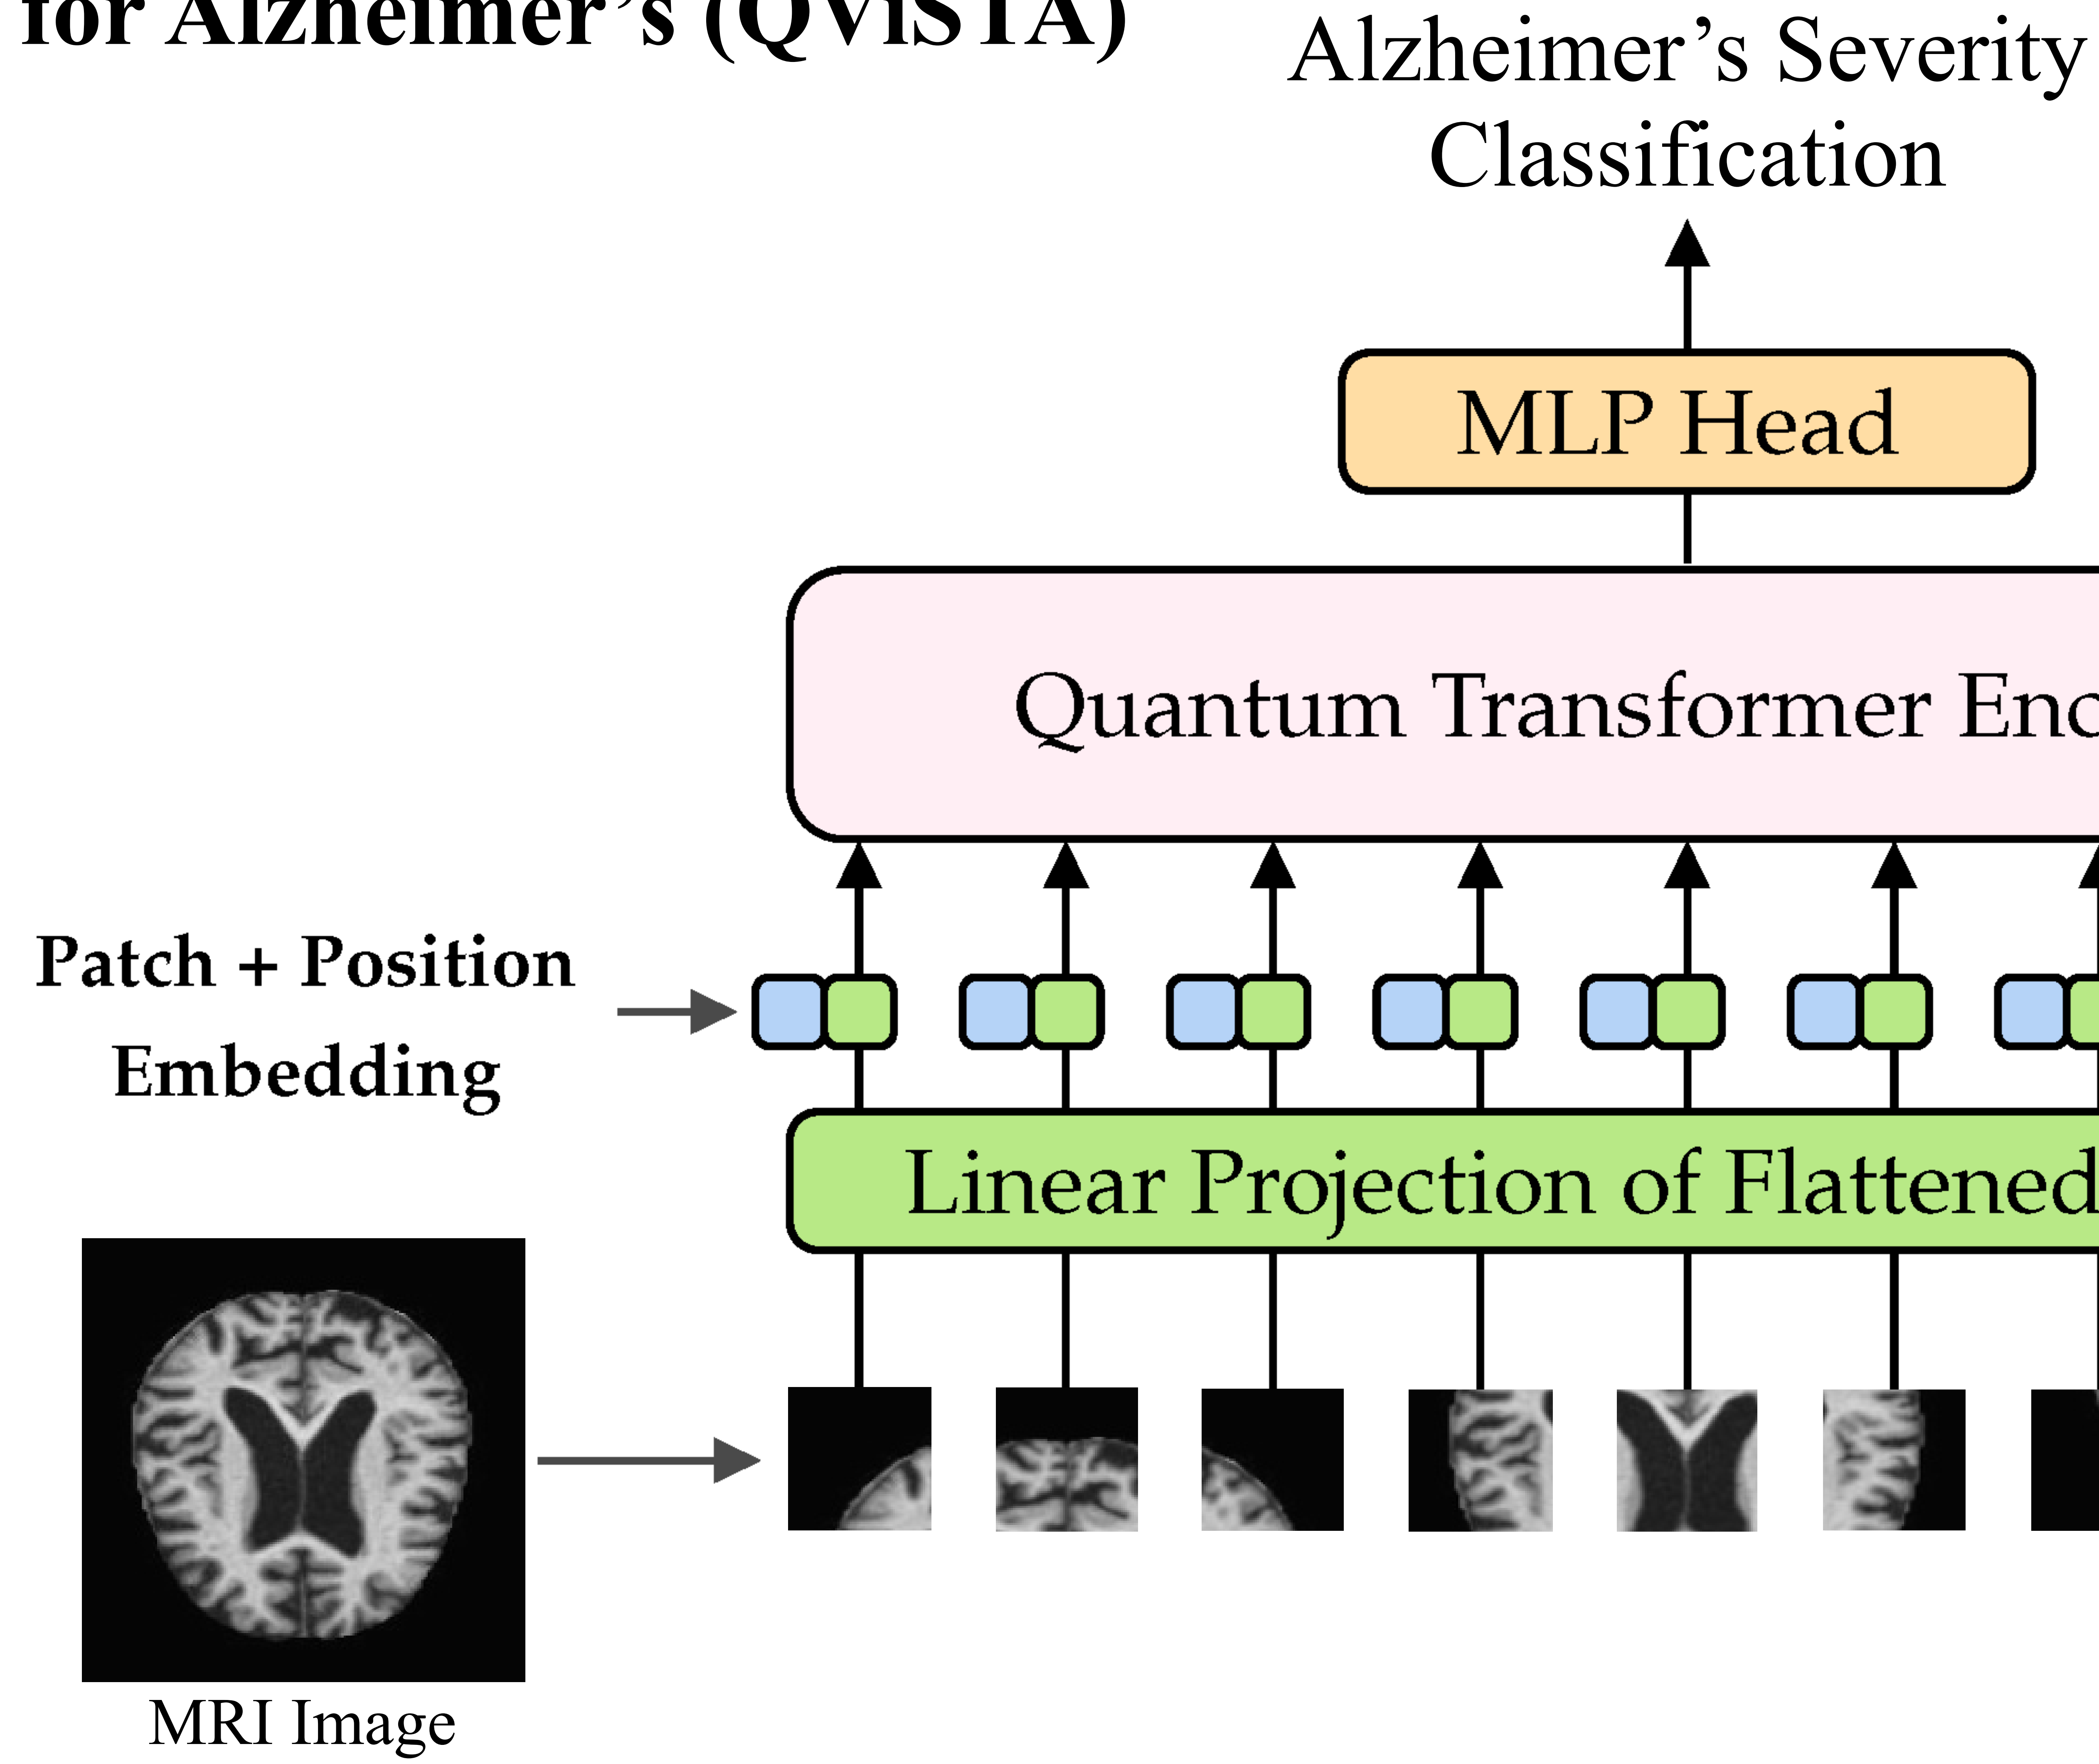

## Encoder

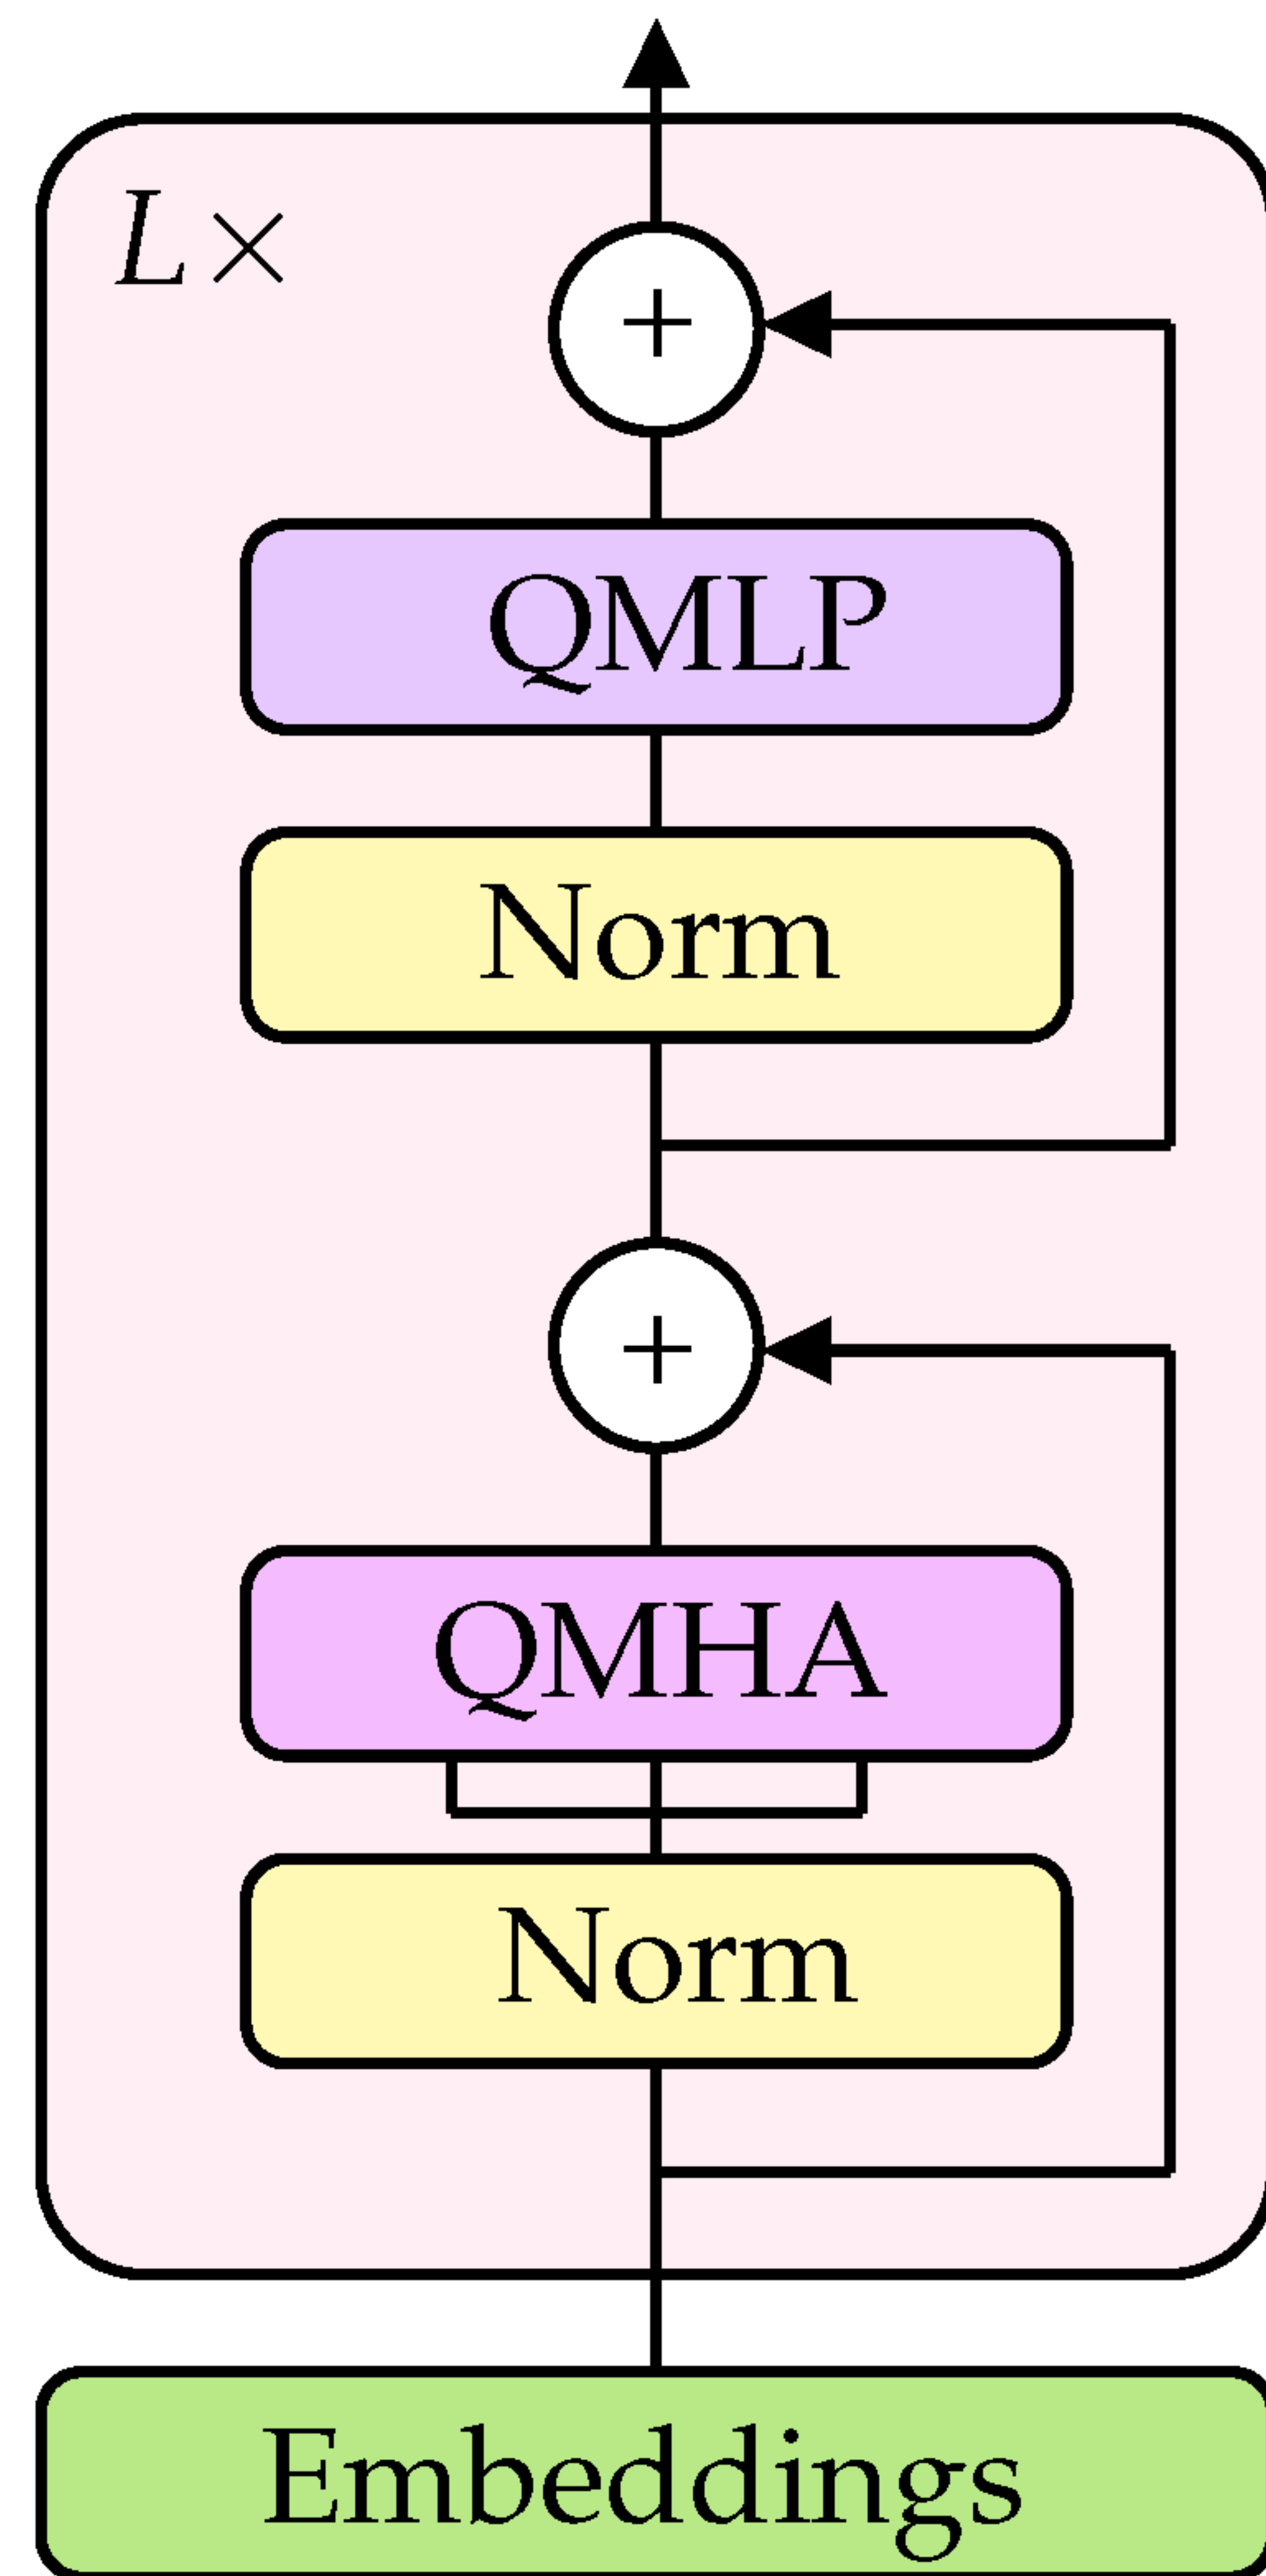

Supplement: supplementary_material [file attachment]
